# Supplementary material for: Transcriptome analysis of Crossostephium chinensis provides insight into the molecular basis of salinity stress responses
Source: PLoS One. 2017 Nov 13;12(11):e0187124. doi: 10.1371/journal.pone.0187124 (PMC5683599; doi:10.1371/journal.pone.0187124)
Supplement: S2 Table — (XLSX) [file pone.0187124.s002.xlsx]

## Sheet: GO enrichment-padj<0.05
S2 DEGs enriched in GO terms
GO_accession	Description	Term_type	DEG number/ontology percent
			ST3 vs ST0	ST9 vs ST3	ST9 vs ST0
GO:0044723	single-organism carbohydrate metabolic process	biological_process	117/7.83%	267/6.78%	370/5.95%
GO:0044262	cellular carbohydrate metabolic process	biological_process	85/5.69%	189/4.80%	263/4.23%
GO:0006073	cellular glucan metabolic process	biological_process	47/3.15%	83/2.11%	110/1.77%
GO:0044042	glucan metabolic process	biological_process	47/3.15%	83/2.11%	110/1.77%
GO:0044264	cellular polysaccharide metabolic process	biological_process	64/4.28%	146/3.71%	211/3.39%
GO:0005976	polysaccharide metabolic process	biological_process	65/4.35%	150/3.81%	218/3.50%
GO:0005985	sucrose metabolic process	biological_process	42/2.81%	75/1.91%
GO:0005982	starch metabolic process	biological_process	39/2.61%	71/1.80%
GO:0009311	oligosaccharide metabolic process	biological_process	54/3.61%	98/2.49%
GO:0005984	disaccharide metabolic process	biological_process	48/3.21%	86/2.18%
GO:0005975	carbohydrate metabolic process	biological_process	157/10.51%
GO:0009765	photosynthesis, light harvesting	biological_process		5/0.13%	5/0.08%
GO:0005975	carbohydrate metabolic process	biological_process		383/9.73%
GO:0008152	metabolic process	biological_process		2430/61.74%
GO:0055085	transmembrane transport	biological_process		298/7.57%
GO:0016051	carbohydrate biosynthetic process	biological_process		143/3.63%
GO:0034637	cellular carbohydrate biosynthetic process	biological_process		103/2.62%
GO:0006629	lipid metabolic process	biological_process		303/7.70%
GO:0019203	carbohydrate phosphatase activity	molecular_function		11/0.28%
GO:0005215	transporter activity	molecular_function		382/9.71%
GO:0003824	catalytic activity	molecular_function		2141/54.40%
GO:0004185	serine-type carboxypeptidase activity	molecular_function		22/0.56%
GO:0020037	heme binding	molecular_function	53/3.55%
GO:0005549	odorant binding	molecular_function	9/0.60%
GO:0046906	tetrapyrrole binding	molecular_function	54/3.61%
GO:0016758	transferase activity, transferring hexosyl groups	molecular_function	53/3.55%
padj < 0.05

## Sheet: ST3vsST0
ST3vsST0.DEG_GO_enrichment_resu
GO_accession	Description	Term_type	Over_represented_pValue	Corrected_pValue	DEG_item	DEG_list
GO:0009311	oligosaccharide metabolic process	biological_process	1.1215e-09	6.0208e-06	54	1494
GO:0005984	disaccharide metabolic process	biological_process	2.3664e-09	6.0208e-06	48	1494
GO:0006073	cellular glucan metabolic process	biological_process	4.2769e-09	6.0208e-06	47	1494
GO:0044042	glucan metabolic process	biological_process	4.2769e-09	6.0208e-06	47	1494
GO:0005985	sucrose metabolic process	biological_process	5.6253e-08	6.3352e-05	42	1494
GO:0044723	single-organism carbohydrate metabolic process	biological_process	1.4685e-07	0.00013782	117	1494
GO:0044262	cellular carbohydrate metabolic process	biological_process	2.9354e-07	0.00023613	85	1494
GO:0005982	starch metabolic process	biological_process	3.8896e-07	0.00027378	39	1494
GO:0020037	heme binding	molecular_function	9.9235e-07	0.00062088	53	1494
GO:0005549	odorant binding	molecular_function	1.3062e-06	0.00073551	9	1494
GO:0046906	tetrapyrrole binding	molecular_function	1.5932e-06	0.00081555	54	1494
GO:0005975	carbohydrate metabolic process	biological_process	7.6017e-06	0.0035671	157	1494
GO:0044264	cellular polysaccharide metabolic process	biological_process	2.6128e-05	0.011317	64	1494
GO:0005976	polysaccharide metabolic process	biological_process	4.8638e-05	0.019563	65	1494
GO:0016758	transferase activity, transferring hexosyl groups	molecular_function	7.9764e-05	0.029943	53	1494

## Sheet: ST9vsST3
	ST9vsST3.DEG_GO_enrichment_resu
GO_accession	GO_accession	Description	Term_type	Over_represented_pValue	Corrected_pValue	DEG_item	DEG_list
GO:0009311	GO:0044723	single-organism carbohydrate metabolic process	biological_process	2.4953e-09	9.5714e-06	267	3936
GO:0005984	GO:0005975	carbohydrate metabolic process	biological_process	3.3995e-09	9.5714e-06	383	3936
GO:0006073	GO:0044262	cellular carbohydrate metabolic process	biological_process	9.1183e-09	1.7115e-05	189	3936
GO:0044042	GO:0009311	oligosaccharide metabolic process	biological_process	5.729e-08	8.065e-05	98	3936
GO:0005985	GO:0005984	disaccharide metabolic process	biological_process	9.8384e-08	0.0001108	86	3936
GO:0044723	GO:0044264	cellular polysaccharide metabolic process	biological_process	2.2536e-07	0.0002115	146	3936
GO:0044262	GO:0005976	polysaccharide metabolic process	biological_process	3.6541e-07	0.00023164	150	3936
GO:0005982	GO:0009765	photosynthesis, light harvesting	biological_process	3.6747e-07	0.00023164	5	3936
GO:0005975	GO:0006073	cellular glucan metabolic process	biological_process	4.1136e-07	0.00023164	83	3936
GO:0044264	GO:0044042	glucan metabolic process	biological_process	4.1136e-07	0.00023164	83	3936
GO:0005976	GO:0008152	metabolic process	biological_process	1.0465e-06	0.0005357	2430	3936
GO:0005975	GO:0005985	sucrose metabolic process	biological_process	2.7737e-06	0.0013016	75	3936
GO:0009765	GO:0005982	starch metabolic process	biological_process	7.7551e-06	0.0033591	71	3936
GO:0008152	GO:0055085	transmembrane transport	biological_process	8.4545e-06	0.0034005	298	3936
GO:0055085	GO:0016051	carbohydrate biosynthetic process	biological_process	2.2861e-05	0.0080455	143	3936
GO:0016051	GO:0034637	cellular carbohydrate biosynthetic process	biological_process	6.5226e-05	0.021605	103	3936
GO:0034637	GO:0019203	carbohydrate phosphatase activity	molecular_function	8.0125e-05	0.025066	11	3936
GO:0006629	GO:0005215	transporter activity	molecular_function	0.00012634	0.037444	382	3936
GO:0019203	GO:0006629	lipid metabolic process	biological_process	0.0001362	0.038347	303	3936
GO:0005215	GO:0003824	catalytic activity	molecular_function	0.0001616	0.043332	2141	3936
GO:0003824	GO:0004185	serine-type carboxypeptidase activity	molecular_function	0.00018275	0.046776	22	3936
GO:0004185
GO:0020037
GO:0005549
GO:0046906
GO:0016758

## Sheet: ST9vsST0
ST9vsST0.DEG_GO_enrichment_resu
GO_accession	Description	Term_type	Over_represented_pValue	Corrected_pValue	DEG_item	DEG_list
GO:0044264	cellular polysaccharide metabolic process	biological_process	2.5517e-07	0.00095112	211	6220
GO:0005976	polysaccharide metabolic process	biological_process	3.3782e-07	0.00095112	218	6220
GO:0044262	cellular carbohydrate metabolic process	biological_process	9.2007e-07	0.001727	263	6220
GO:0009765	photosynthesis, light harvesting	biological_process	3.3136e-06	0.0046648	5	6220
GO:0044723	single-organism carbohydrate metabolic process	biological_process	6.4458e-06	0.0072592	370	6220
GO:0006073	cellular glucan metabolic process	biological_process	4.4893e-05	0.036113	110	6220
GO:0044042	glucan metabolic process	biological_process	4.4893e-05	0.036113	110	6220
